# Supplementary material for: Structural characteristics of an insect group I chitinase, an enzyme indispensable to moulting
Source: PubMed Central journal article supplement (PMC3975886; doi:10.1107/s1399004713033841), 2014-03-19
Supplement: d-70-00932-sup1.pdf [file d-70-00932-sup1.pdf]

**Table S1** Sequence identities of *OfChtI*-CAD with other structure-known chitinases from different species.

| Species                                 | PDB  | Identity (%) | RMSD |
|-----------------------------------------|------|--------------|------|
| <i>Homo sapiens</i>                     | 3fxy | 43           | 0.90 |
|                                         | 1guv | 40           | 1.07 |
| <i>Nicotiana tabacum</i>                | 3alf | 30           | 1.79 |
| <i>Bacillus circulans</i>               | 1itx | 29           | 1.07 |
| <i>Arabidopsis thaliana</i>             | 3aqu | 27           | 1.56 |
| <i>Serratia marcescens</i>              | 1e15 | 27           | 1.80 |
|                                         | 1ctn | 27           | 1.53 |
| <i>Lactococcus lactis</i>               | 3ian | 27           | 2.74 |
| <i>Aspergillus fumigatus</i>            | 1w9p | 27           | 1.56 |
|                                         | 2y8v | 26           | 2.87 |
| <i>Vibrio harveyi</i>                   | 3b8s | 26           | 1.26 |
| <i>Yersinia entomophaga</i>             | 3oa5 | 26           | 1.80 |
| <i>Bacteroides<br/>thetaiotaomicron</i> | 3co4 | 25           | 2.20 |
| <i>Coccidioides immitis</i>             | 1d2k | 25           | 1.16 |
| <i>Arthrobacter tad20</i>               | 1kfw | 24           | 1.52 |
| <i>Clonostachys rosea</i>               | 3g6l | 23           | 1.25 |
| <i>Moritella marina</i>                 | 4hmc | 22           | 2.67 |
| <i>Bacillus cereus</i>                  | 3n15 | 22           | 2.67 |
| <i>Crocus vernus</i>                    | 3sim | 21           | 2.47 |

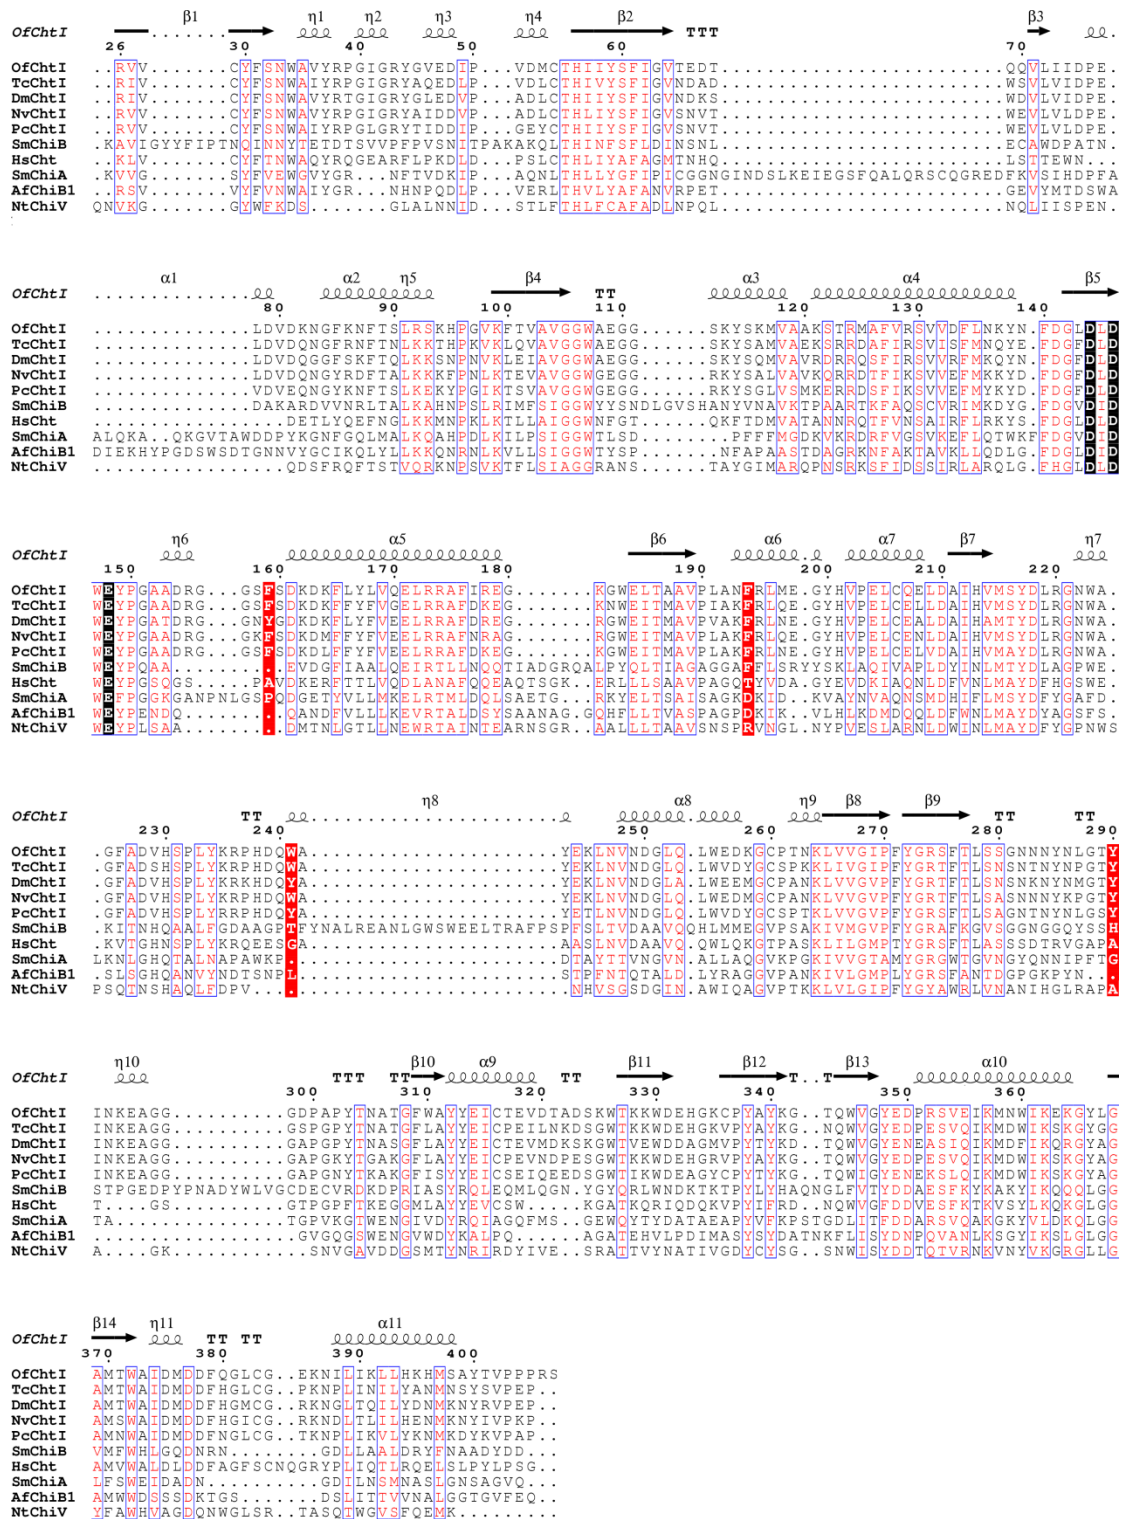

**Figure S1**

Structure-based sequence alignment of *OfChtI*-CAD with other GH18 chitinases from various species. The insect Group I chitinases include *OfChtI* from the lepidopteran insect *Ostrinia furnacalis* (Genbank ABB97081, PDB entry 3w4r), *PcChtI* from the hemipteran insect *Poophilus costalis* (Genbank AFW03959), *NvChtI* from the hymenopteran insect *Nasonia*

*vitripennis* (Genbank NP\_001155084.1), *TcChtI* from the coleopteran insect *Tribolium castaneum* (Genbank AAV74190), and *DmChtI* from the dipteran insect *Drosophila melanogaster* (Genbank AAF54987). The other known chitinases include *SmChiA* (PDB entry 1ctn) and *SmChiB* (PDB entry 1e15) from *Serratia marcescens*, *HsCht* from *Homo sapiens* (PDB entry 1lg1), *AfChiB1* from *Aspergillus fumigatus* (PDB entry 1w9p), and *NtChiV* from *Nicotiana tabacum* (PDB entry 3alf). The secondary structure elements of *OfChtI*-CAD are shown and labeled. The conserved catalytic residues are labeled with black background blocks. The four aromatic residues, which form a hydrophobic plane on the surface of *OfChtI*-CAD, are highly conserved in the insect Group I chitinases but are absent in those from other species. They are labeled with red background blocks. The sequence alignment was generated by PROMALS3D (Pei *et al.*, 2008) and the picture was generated by ESPript (Gouet *et al.*, 2003).

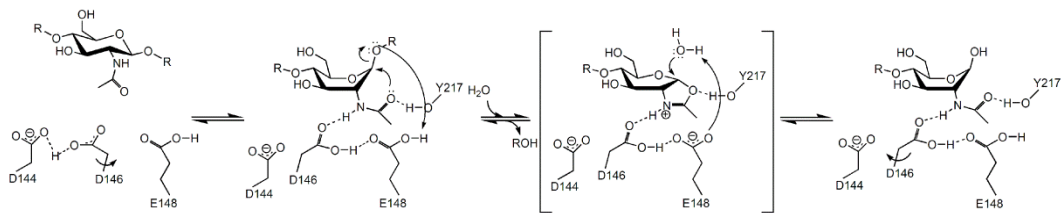

**Figure S2**

Proposed catalytic mechanism of family 18 chitinases, based on mechanism deduced by van Aalten *et al.* (2001).

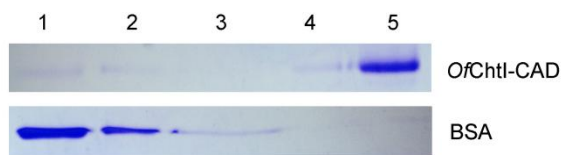

**Figure S3**

The binding of *OfChtI*-CAD to crystalline  $\alpha$ -chitin. The mixtures (50  $\mu$ l) contained 10  $\mu$ g *OfChtI*-CAD and 1.0 mg crystalline  $\alpha$ -chitin in 50 mM sodium phosphate buffer, pH 6.5. The mixtures were incubated at 303 K for 3 h and then centrifuged at 13 000g for 5 min. The supernatant was collected and the pellet was washed in 50  $\mu$ l of 50 mM sodium phosphate buffer, pH 6.5, 50 mM sodium phosphate buffer, pH 6.5, containing 1M NaCl, and 0.1 M acetic

acid in turn. After centrifugation of each wash, the supernatants were collected. Finally, the pellet and all collected supernatants were subjected to 10% SDS-PAGE. Lane 1, unbound fraction; lane 2, wash fraction in 50 mM sodium phosphate; lane 3, wash fraction in 50 mM sodium phosphate containing 1M NaCl; lane 4, wash fraction in 0.1 M acetic acid; lane 5, bound fraction. BSA was used as a control.
